# Supplementary material
Source: PubMed Central journal article supplement (PMC7724250)
Supplement: veaa059_supplementary_data.pdf [file veaa059_supplementary_data.pdf]

C. Module 3

104Y\_A beta-agarase A (E.C.3.2.1.81); BETA-AGARASE, GLYCOSIDE HYDROLASE FAMILY 16; HET: SO4; 1.48A (Zobellia galactanivorans) SCOP: b.29.1.2; Related PDB entries: 1URX\_A ; Related PDB entries: 1URX\_A  
Probability: 81.76%, E-value: 69, Score: 29.46, Aligned cols: 188, Identities: 16%, Similarity: 0.189

Table with 5 columns: Query ID (Q ss\_pred, Q WP\_009778041, Q Consensus), Target ID (T Consensus, T 104Y\_A, T ss\_dssp, T ss\_pred), Alignment (sequence and secondary structure), and Scores (e.g., 80 (340), 158 (340), 213 (288)).

Supplementary figure 1. Results of the HHpred search seeded with the multiple sequence alignments prepared from proteins in module 1 (A), 2 (B) and 3 (C). H(h), α-helix; C(c), coil; Q, query; T, target; ss, secondary structure.

Multiple sequence alignment of GH16 family proteins and their inactive derivatives. The table lists sequences from various bacterial and viral sources, including Pseudomonas carriagevenora, Bacillus licheniformis, and Mimivirus. Sequences are numbered on the left and right, indicating specific residues. Active proteins are shown in red text, while inactive derivatives are shown in green text. Inactive sequences are indicated with their corresponding PDB identifiers in parentheses. Conserved residues are shown in bold. Some sequences are truncated with ellipses. The alignment is presented in two columns, with the first column containing sequences 1-332 and the second column containing sequences 112-950.

**Supplementary figure 2.** Multiple sequence alignment of GH16 family proteins and their inactive derivatives. Enzymatically active GH16 family proteins for which X-ray structures available are shown in red and indicated with the corresponding PDB identifiers. Inactivated GH16 derivatives encoded by diverse bacteria and giant viruses are indicated with green and red fonts, respectively. Note that bacterial sequences include representatives of all 3 modules defined in Figure 2A. Long, non-conserved insertions are not shown for clarity, with the exact number of omitted residues indicated in parenthesis.

**Supplementary table 1.** Composition of the Modules 1 to 3.

| <b>Accession #</b> | <b>Organism name</b>                      | <b>Taxon</b>   |
|--------------------|-------------------------------------------|----------------|
| <b>Module 1</b>    |                                           |                |
| WP_004001160       | <i>Streptomyces viridochromogenes</i>     | Actinobacteria |
| WP_013422495       | <i>Frankia inefficax</i>                  | Actinobacteria |
| WP_018542795       | unclassified <i>Streptomyces</i>          | Actinobacteria |
| WP_019070481       | <i>Streptomyces hokutonensis</i>          | Actinobacteria |
| WP_019524852       | unclassified <i>Streptomyces</i>          | Actinobacteria |
| WP_019524853       | unclassified <i>Streptomyces</i>          | Actinobacteria |
| WP_033294507       | <i>Amycolatopsis jejuensis</i>            | Actinobacteria |
| WP_036346721       | <i>Micromonospora</i>                     | Actinobacteria |
| WP_043667143       | <i>Streptomyces xylophagus</i>            | Actinobacteria |
| WP_051763122       | <i>Streptomyces virginiae</i>             | Actinobacteria |
| WP_051773929       | <i>Streptomyces</i> sp. NRRL S-237        | Actinobacteria |
| WP_051782626       | unclassified <i>Streptomyces</i>          | Actinobacteria |
| WP_051816291       | <i>Streptomyces</i> sp. NRRL WC-3744      | Actinobacteria |
| WP_051818725       | <i>Streptomyces</i>                       | Actinobacteria |
| WP_051848524       | <i>Streptomyces</i> sp. NRRL WC-3725      | Actinobacteria |
| WP_051854226       | unclassified <i>Streptomyces</i>          | Actinobacteria |
| WP_052021393       | <i>Actinokineospora spheciospongiae</i>   | Actinobacteria |
| WP_052183290       | <i>Streptomyces</i> sp. UNC401CLCol       | Actinobacteria |
| WP_052681576       | <i>Saccharothrix</i> sp. ST-888           | Actinobacteria |
| WP_053211603       | <i>Streptomyces antibioticus</i>          | Actinobacteria |
| WP_055613714       | <i>Streptomyces phaeochromogenes</i>      | Actinobacteria |
| WP_055613717       | <i>Streptomyces phaeochromogenes</i>      | Actinobacteria |
| WP_066927533       | <i>Streptomyces</i> sp. NBRC 110611       | Actinobacteria |
| WP_073215198       | <i>Streptomyces</i> sp. NBRC 110465       | Actinobacteria |
| WP_073496364       | <i>Streptomyces phaeoluteigriseus</i>     | Actinobacteria |
| WP_073904122       | <i>Streptomyces</i> sp. CB02009           | Actinobacteria |
| WP_078637708       | <i>Streptomyces</i>                       | Actinobacteria |
| WP_079134226       | unclassified <i>Streptomyces</i>          | Actinobacteria |
| WP_079134227       | unclassified <i>Streptomyces</i>          | Actinobacteria |
| WP_079141677       | <i>Streptomyces</i> sp. LUP30             | Actinobacteria |
| WP_079149609       | <i>Streptomyces</i> sp. EN27              | Actinobacteria |
| WP_079180745       | <i>Streptomyces</i> sp. CB02058           | Actinobacteria |
| WP_079180747       | <i>Streptomyces</i> sp. CB02058           | Actinobacteria |
| WP_079185489       | <i>Streptomyces</i> sp. NBRC 110465       | Actinobacteria |
| WP_079188286       | <i>Streptomyces</i> sp. CB0200            | Actinobacteria |
| WP_079192651       | <i>Streptomyces</i> sp. CB01883           | Actinobacteria |
| WP_083753708       | <i>Actinosynnema</i> sp. ALI-1.44         | Actinobacteria |
| WP_087924989       | <i>Streptomyces albireticuli</i> ] 134    | Actinobacteria |
| WP_088961757       | <i>Micromonospora purpureochromogenes</i> | Actinobacteria |
| WP_091451464       | <i>Alloactinosynnema iranicum</i>         | Actinobacteria |
| WP_092650511       | <i>Actinopolymorpha singaporensis</i>     | Actinobacteria |
| WP_092886397       | <i>Actinopolymorpha cephalotaxi</i>       | Actinobacteria |
| WP_093471991       | unclassified <i>Streptomyces</i>          | Actinobacteria |
| WP_093627747       | <i>Streptomyces</i> sp. 3213.3            | Actinobacteria |

|              |                                    |                |
|--------------|------------------------------------|----------------|
| WP_093736433 | unclassified Streptomyces          | Actinobacteria |
| WP_093908613 | Streptomyces sp. Cf386             | Actinobacteria |
| WP_095578871 | Streptomyces albireticuli          | Actinobacteria |
| WP_100825925 | Streptomyces sp. 69                | Actinobacteria |
| WP_106246877 | Allonocardia opalescens            | Actinobacteria |
| WP_106432501 | unclassified Streptomyces          | Actinobacteria |
| WP_107072723 | Streptomyces sp. NRRL B-1568       | Actinobacteria |
| WP_109497567 | Streptomyces sp. Act143            | Actinobacteria |
| WP_110079847 | Actinokineospora mزابensis         | Actinobacteria |
| WP_116021934 | Actinomadura umbrina               | Actinobacteria |
| WP_116021939 | Actinomadura umbrina               | Actinobacteria |
| WP_116180669 | Kutzneria buriramensis             | Actinobacteria |
| WP_121801026 | Streptomyces griseocarneus         | Actinobacteria |
| WP_123440892 | Streptomyces sp. PanSC9            | Actinobacteria |
| WP_125594626 | Streptomyces sp. WAC07061          | Actinobacteria |
| WP_125814831 | Streptomyces sp. WAC07149          | Actinobacteria |
| WP_129593328 | Streptomyces sp. C                 | Actinobacteria |
| WP_130876631 | Streptomyces netropsis             | Actinobacteria |
| WP_138043881 | Streptomyces sp. NEAU-C151         | Actinobacteria |
| WP_141208225 | Streptomyces griseorubiginosus     | Actinobacteria |
| WP_141561871 | Micromonospora sp. WMMA1996        | Actinobacteria |
| WP_141684583 | Micromonospora sediminicola        | Actinobacteria |
| WP_143593014 | Streptomyces albireticuli          | Actinobacteria |
| WP_145788523 | Kitasatospora atroaurantiaca       | Actinobacteria |
| WP_146045455 | Streptomyces eurocidicus           | Actinobacteria |
| WP_146238386 | Streptomyces sp. Act143            | Actinobacteria |
| WP_146238387 | Streptomyces sp. Act143            | Actinobacteria |
| WP_147472096 | Streptomyces griseocarneus         | Actinobacteria |
| WP_148349770 | Actinomadura syzygii               | Actinobacteria |
| WP_148349773 | Actinomadura syzygii               | Actinobacteria |
| WP_148767260 | Actinomadura sp. CYP1-5            | Actinobacteria |
| WP_148767263 | Actinomadura sp. CYP1-5            | Actinobacteria |
| WP_153278161 | Saccharothrix syringae             | Actinobacteria |
| WP_153541889 | Streptomyces sp. RB17              | Actinobacteria |
| WP_154936519 | Micromonospora palomenae           | Actinobacteria |
| WP_154936522 | Micromonospora palomenae           | Actinobacteria |
| WP_157745954 | Micromonospora purpureochromogenes | Actinobacteria |
| WP_159042716 | Streptomyces curacoii              | Actinobacteria |
| WP_159395205 | Streptomyces albireticuli          | Actinobacteria |
| WP_161069931 | Streptomyces sp. HUCO-GS316        | Actinobacteria |
| WP_161108180 | Streptomyces sp. XHT-2             | Actinobacteria |
| WP_161108181 | Streptomyces sp. XHT-2             | Actinobacteria |
| WP_161231499 | Streptomyces sp. SID4956           | Actinobacteria |
| WP_161241892 | Streptomyces sp. SID2888           | Actinobacteria |
| WP_161241895 | Streptomyces sp. SID2888           | Actinobacteria |
| WP_161241896 | Streptomyces sp. SID2888           | Actinobacteria |
| WP_161290971 | Streptomyces sp. SID1046           | Actinobacteria |

|              |                            |                |
|--------------|----------------------------|----------------|
| WP_168211442 | Actinosynnema sp. ALI-1.44 | Actinobacteria |
| WP_053601342 | Bacillus sp. FJAT-18017    | Firmicutes     |
| WP_066204414 | Bacillus sp. FJAT-27225    | Firmicutes     |
| WP_099355020 | Bacillus onubensis         | Firmicutes     |
| WP_099364288 | Bacillus onubensis         | Firmicutes     |
| WP_011952500 | Sphingomonas wittichii     | Proteobacteria |
| WP_016746823 | Sphingomonas wittichii     | Proteobacteria |
| WP_047168197 | Sphingomonas sp. Y57       | Proteobacteria |
| WP_052420046 | Hyalangium minutum         | Proteobacteria |
| WP_056354592 | unclassified Sphingomonas  | Proteobacteria |
| WP_132145912 | Luteibacter rhizovincinus  | Proteobacteria |
| WP_146728083 | Minicystis rosea           | Proteobacteria |
| WP_170328229 | Ruegeria arenilitoris      | Proteobacteria |
| WP_170609244 | Ruegeria conchae           | Proteobacteria |

## Module 2

|              |                                |                |
|--------------|--------------------------------|----------------|
| WP_068013487 | Nocardia mexicana              | Actinobacteria |
| WP_024802787 | Nocardia sp. BMG51109          | Actinobacteria |
| WP_146251404 | Nocardia tenerifensis          | Actinobacteria |
| WP_138666465 | Nonomuraea turkmeniaca         | Actinobacteria |
| WP_028931974 | Pseudonocardia asaccharolytica | Actinobacteria |
| WP_009478479 | Rhodococcus sp. JVH1           | Actinobacteria |
| WP_055722186 | Streptomyces                   | Actinobacteria |
| WP_050371984 | Streptomyces acidiscabies      | Actinobacteria |
| WP_075730970 | Streptomyces acidiscabies      | Actinobacteria |
| WP_053210749 | Streptomyces antibioticus      | Actinobacteria |
| WP_037701643 | Streptomyces atratus           | Actinobacteria |
| WP_062050432 | Streptomyces canus             | Actinobacteria |
| WP_050782599 | Streptomyces griseoflavus      | Actinobacteria |
| WP_073502273 | Streptomyces paucisporeus      | Actinobacteria |
| WP_100203414 | Streptomyces sp. TRM SA0054    | Actinobacteria |
| WP_018839510 | unclassified Streptomyces      | Actinobacteria |
| WP_098503344 | Thermoflexus hugenholtzii      | Chloroflexi    |
| WP_151729905 | Thermogemmatispora aurantia    | Chloroflexi    |
| WP_066289961 | Fictibacillus arsenicus        | Firmicutes     |
| WP_066394060 | Fictibacillus phosphorivorans  | Firmicutes     |
| WP_019637377 | Paenibacillus fonticola        | Firmicutes     |
| WP_144873436 | Paenibacillus ihbetae          | Firmicutes     |
| WP_127588546 | Paenibacillus koleovorans      | Firmicutes     |
| WP_076287080 | Paenibacillus odorifer         | Firmicutes     |
| WP_091167356 | Paenibacillus sp. 1_12         | Firmicutes     |
| WP_053375461 | Paenibacillus sp. FJAT-27812   | Firmicutes     |
| WP_039879466 | Paenibacillus sp. FSL R7-0273  | Firmicutes     |
| WP_036692278 | Paenibacillus sp. FSL R7-269   | Firmicutes     |
| WP_129437925 | Paenibacillus sp. FW100M-2     | Firmicutes     |
| WP_057314481 | Paenibacillus sp. Soil766      | Firmicutes     |
| WP_150270317 | Paenibacillus sp. SYSU G01001  | Firmicutes     |

|              |                            |                |
|--------------|----------------------------|----------------|
| WP_038699482 | Paenibacillus stellifer    | Firmicutes     |
| WP_093338107 | Salibacterium halotolerans | Firmicutes     |
| WP_006159786 | Cupriavidus basilensis     | Proteobacteria |
| WP_013954189 | Cupriavidus necator        | Proteobacteria |
| WP_013954198 | Cupriavidus necator        | Proteobacteria |
| WP_116263445 | Pseudomonas sp. OV081      | Proteobacteria |

**Module 3**

|              |                                     |                |
|--------------|-------------------------------------|----------------|
| WP_009778041 | Janibacter sp. HTCC2649             | Actinobacteria |
| WP_091356076 | Frankineae bacterium MT45           | Actinobacteria |
| WP_096304281 | Jatrophihabitans sp. GAS493         | Actinobacteria |
| WP_135839310 | Nocardioides sp. MMS17-SY213        | Actinobacteria |
| WP_139131788 | Micromonospora chersina             | Actinobacteria |
| WP_141844292 | Humibacillus xanthopallidus         | Actinobacteria |
| WP_148616077 | Nocardioides rubriscoriae           | Actinobacteria |
| WP_151461420 | Micromonospora sp. AMSO31t          | Actinobacteria |
| WP_124897093 | Haloplanus aerogenes                | Halobacteria   |
| WP_056193950 | Pelomonas sp. Root1237              | Proteobacteria |
| WP_056264676 | unclassified Pelomonas              | Proteobacteria |
| WP_057300625 | Pelomonas sp. Root1217              | Proteobacteria |
| WP_100922660 | Candidatus Thiodictyon syntrophicum | Proteobacteria |
